# Supplementary material for: Simple Coumarins from Peucedanum luxurians Fruits: Evaluation of Anxiolytic Activity and Influence on Gene Expression Related to Anxiety in Zebrafish Model
Source: MDPI journal article supplement (doi:10.3390/ijms24108693), 2023-05-12
Supplement: s1 [file s1]

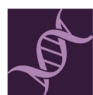

Article

# Simple Coumarins from *Peucedanum luxurians* Fruits: Evaluation of Anxiolytic Activity and Influence on Genes Expression Related to Anxiety on Zebrafish Model

Jarosław Widelski <sup>1,\*</sup>, Natalia Kasica <sup>2</sup>, Monika Maciąg <sup>3</sup>, Simon Vlad Luca <sup>4,5</sup>, Barbara Budzyńska <sup>3</sup>, Dafina Fondai <sup>6</sup>, Piotr Podlasz <sup>7</sup> and Krystyna Skalicka-Woźniak <sup>8,\*</sup>

- <sup>1</sup> Department of Pharmacognosy with Medicinal Plant Unit, Medical University of Lublin, 20-093 Lublin, Poland; jwidelski@pharmacognosy.org (J.W.)
- <sup>2</sup> Department of Animal Anatomy, Faculty of Veterinary Medicine, University of Warmia and Mazury in Olsztyn, 10-719 Olsztyn, Poland; natalia.kasica@uwm.edu.pl (N.K.)
- <sup>3</sup> Independent Laboratory of Behavioral Studies, Medical University of Lublin, 20-093 Lublin, Poland; monika.maciag@umlub.pl (M.M); barbara.budzynska@umlub.pl (B.B)
- <sup>4</sup> Biothermodynamics, TUM School of Life Sciences, Technical University of Munich, 85354 Freising, Germany; vlad.luca@tum.de (S.V.L)
- <sup>5</sup> Department of Pharmacognosy, Grigore T. Popa University of Medicine and Pharmacy Iasi, 700115 Iasi, Romania
- <sup>6</sup> Department of Pharmacy, Faculty of Medicine, University of Prishtina, 10000 Prishtina, Kosovo; Dafina.fondajl@com (D.F.)
- <sup>7</sup> Department of Pathophysiology, Forensic Veterinary Medicine and Administration, Faculty of Veterinary Medicine, University of Warmia and Mazury in Olsztyn, 10-719 Olsztyn, Poland; piotr.podlasz@uwm.edu.pl (P.P)
- <sup>8</sup> Department of Chemistry of Natural Products, Medical University of Lublin, 20-093 Lublin, Poland; kskalicka@pharmacognosy.org (K.S.-W.)

\* Correspondence: jwidelski@pharmacognosy.org (J.W.); kskalicka@pharmacognosy.org (K.S.W.)

**Citation:** Widelski, J.; Kasica, N.; Maciąg, M.; Luca, S.V.; Budzyńska, B.; Fondai, D.; Podlasz, P.; Skalicka-Woźniak, K. Simple Coumarins from *Peucedanum luxurians* Fruits: Evaluation of Anxiolytic Activity and Influence on Gene Expression Related to Anxiety in Zebrafish Model. *Int. J. Mol. Sci.* **2023**, *24*, 8693. <https://doi.org/10.3390/ijms24108693>

Academic Editors: Marta Anna Szychlinska and Antonella Marino Gammazza

Received: 21 March 2023

Revised: 30 April 2023

Accepted: 8 May 2023

Published: 12 May 2023

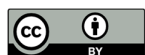

**Copyright:** © 2023 by the authors. Licensee MDPI, Basel, Switzerland. This article is an open access article distributed under the terms and conditions of the Creative Commons Attribution (CC BY) license (<https://creativecommons.org/licenses/by/4.0/>).

**The influence of coumarins isolated from *Peucedanum luxurians* on spontaneous locomotor activity and thigmotaxis behavior of the zebrafish larvae.**

*The influence of officinalin on spontaneous locomotor activity and thigmotaxis behavior of the zebrafish larvae during 40 min light phase.*

The spontaneous locomotor activity was measured as the average distance (in mm) moved during 40 minutes of continuous illumination. One-way ANOVA ( $F(7, 236) = 5.599$ ;  $p = 0.0002$ ) revealed that officinalin at the concentration  $6.0 \mu\text{M}$  decreased spontaneous locomotor activity (**Figure S1a**).

Furthermore, one-way ANOVA showed statistically significant differences between the tested group when the distance moved in the central arena during 40 minutes of continuous light was considered ( $F(7, 236) = 3.872$ ;  $p = 0.0041$ ) (**Figure S1b**). Post-hoc Tukey's test revealed that diazepam increased the percentage of distance moved ( $p < 0.05$ ) in central arena in comparison to control group (DMSO-treated group) (**Figure S1b**).

One-way ANOVA showed also statistically significant differences in time spent in the central arena [ $F(7, 236) = 1.931$ ;  $p = 0.0981$ ] in comparison to the DMSO-treated group (control group) (**Figure S1c**). Post-hoc Tukey's test indicated that diazepam increased the percentage of time spent ( $p < 0.05$ ) in central arena (**Figure S1c**).

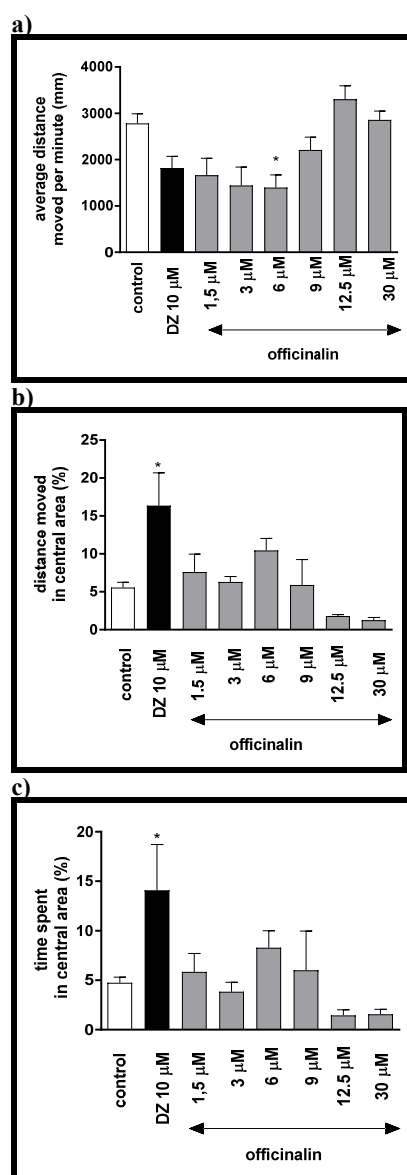

**Figure S1.** The effect of officinalin (1.5, 3, 6, 9, 12.5, 30 µM) and diazepam (DZ 10 µM) on locomotor activity during 40 min light phase. **(a)** Average distance (mm) moved by zebrafish larvae within each 1-min time bin; **(b)** the percentage of the distance moved in the central arena under continuous illumination; **(c)** the percentage of the time spent in the central arena under the continuous illumination. Data are presented as mean ± SEM, n=30, \*p<0.01 in comparison to the control group, post hoc Tukey's test.

*The influence of stenocarpin isobutyrate on spontaneous locomotor activity and thigmotaxis behavior of the zebrafish larvae during 40 min light phase.*

The spontaneous locomotor activity was measured as the average distance (in mm) moved during 40 minutes of continuous illumination. One-way ANOVA ( $F(7, 236) = 0.5513$ ;  $p = 0.7894$ ) revealed that stenocarpin isobutyrate in all concentrations (1.5, 3.0, 6.0, 9.0, 12.5 and 30 µM) has not influenced the spontaneous locomotor activity (**Figure S2a**).

Furthermore, one-way ANOVA showed statistically significant differences between the tested group when the distance moved in the central arena during 40 minutes of continuous light was considered ( $F(7, 236) = 1.430$ ;  $p = 0.2258$ ) (**Figure S2b**). Post-hoc test (Tukey's test) confirmed that diazepam increased ( $p < 0.05$ ) the percentage of distance moved in central arena in comparison to DMSO-treated group (**Figure S2b**).

One-way ANOVA showed also statistically significant differences in time spent in the central arena [ $F(7, 236) = 7.449$ ;  $p < 0.0001$ ] in comparison to DMSO-treated group (control group) (**Figure S2c**). Post-hoc test (Tukey's test) confirmed that diazepam increased ( $p < 0.01$ ) the percentage of time spent in central arena (**Figure S2c**). Moreover, post-hoc Tukey's test showed that stenocarpin isobutyrate decreased the percentage of time spent in central arena in dose 6.0, 9.0, 12.5 ( $p < 0.05$ ) and 30  $\mu\text{M}$  ( $p < 0.01$ ) in comparison to control group (DMSO-treated group) (**Figure S2c**).

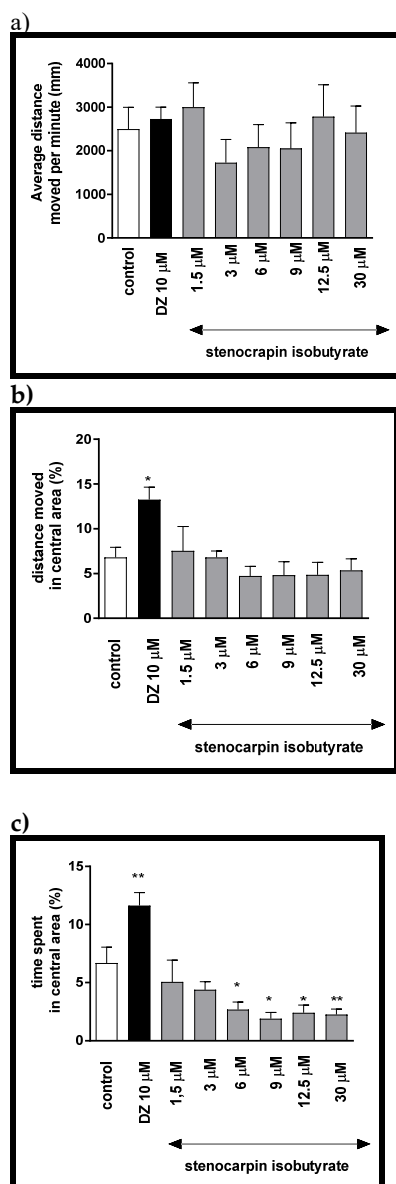

**Figure S2.** The effect of stenocarpin isobutyrate (1.5, 3, 6, 9, 12.5, 30  $\mu\text{M}$ ) and diazepam (DZ 10  $\mu\text{M}$ ) on locomotor activity during 40 min light phase. (a) Average distance (mm) moved by zebrafish larvae within each 1-min time bin; (b) the percentage of the distance moved in the

central arena under continuous illumination; (c) the percentage of the time spent in the central arena under the continuous illumination. Data are presented as mean  $\pm$  SEM,  $n=30$ , \* $p<0.05$ , \*\* $p<0.01$  in comparison to the control group, post hoc Tukey's test.

***The influence of officinalin isobutyrate on spontaneous locomotor activity and thigmotaxis behavior of the zebrafish larvae during 40 min light phase.***

The spontaneous locomotor activity was measured as the average distance (in mm) moved during 40 minutes of continuous illumination. One-way ANOVA [ $F(7, 250) = 0.9745$ ,  $p=0.4645$ ] revealed that stenocarpin isobutyrate in all concentrations (1.5, 3.0, 6.0, 9.0, 12.5 and 30  $\mu\text{M}$ ) has not influenced the spontaneous locomotor activity (**Figure S3a**).

Furthermore, one-way ANOVA showed statistically significant differences between the tested group when the distance moved in the central arena during 40 minutes of continuous light was considered ( $F(7, 250) = 4.559$ ,  $p=0.011$ ) (**Figure S3b**). Post-hoc test (Tukey's test) revealed that diazepam increased ( $p<0.05$ ) the percentage of distance moved in central arena in comparison to DMSO-treated group (**Figure S3b**).

One-way ANOVA showed also statistically significant differences in time spent in the central arena [ $F(7, 250) = 6.439$ ,  $p<0.0001$ ] in comparison to DMSO-treated group (control group) (**Figure S3c**). Post-hoc test (Tukey's test) indicated that diazepam increased ( $p<0.05$ ) the percentage of time spent in central arena in comparison to DMSO-treated group (**Figure S3c**). Moreover, post-hoc Tukey's test showed that officinalin isobutyrate at concentration 30  $\mu\text{M}$  decreased ( $p<0.05$ ) time spent in central arena in comparison to DMSO-treated (control) group (**Figure S3c**).

a)

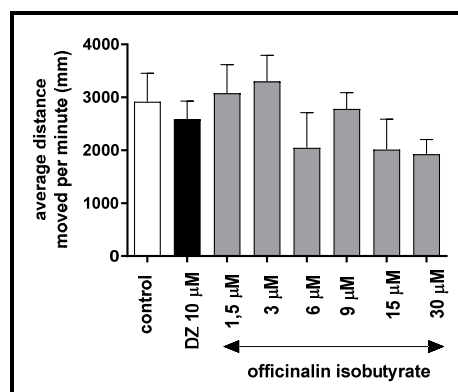

b)

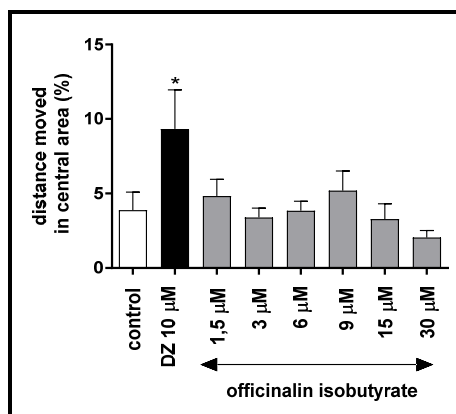

c)

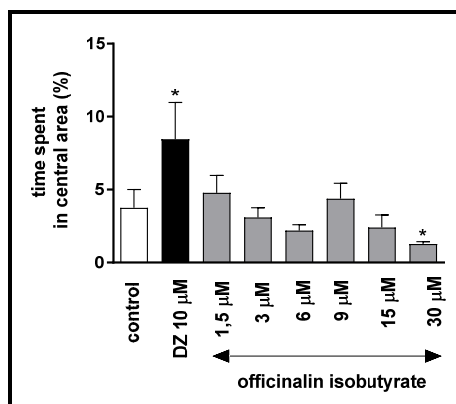

**Figure S3.** The effect of officinalin isobutyrate (1.5, 3, 6, 9, 12.5, 30  $\mu$ M) and diazepam (10  $\mu$ M) on locomotor activity during 40 min light phase. (a) Average distance (mm) moved by zebrafish larvae within each 1-min time bin; (b) the percentage of the distance moved in the central arena under continuous illumination; (c) the percentage of the time spent in the central arena under the continuous illumination. Data are presented as mean  $\pm$  SEM,  $n=32$ , \*\* $p<0.01$  in comparison to the control group, post hoc Tukey's test.
